# Supplementary material
Source: HighWire-hosted journal article supplement (http://jpet.aspetjournals.org/highwire/filestream/156486/field_highwire_adjunct_files/1/2330_supp_fig2.pdf)
Supplement: 2330_supp_fig2.pdf [file 2330_supp_fig2.pdf]

# **CH6824025, potent and selective DDR1 inhibitor, reduces kidney fibrosis in UUO mice**

## **Names of authors**

Yukari Yasui, Takeshi Murata, Yoshinori Tsuboi, Atsuko Murai, Naoshi Horiba

Research Division, Chugai Pharmaceutical Co., Ltd., Yokohama city, Kanagawa, Japan. (Y.Y., T.M., Y.T., N.H.)

Translational Research Division, Chugai Pharmaceutical Co., Ltd., Yokohama city, Kanagawa, Japan. (A.M.)

The Journal of Pharmacology and Experimental Therapeutics

JPET-AR-2024-002330



Supplemental Figure 2. Histopathological images (**A, C**) before and (**B, D**) after classification of HALO AI v3.4. Red, tubular dilatation area; light blue, kidney area except tubular dilatation area. HE staining. Bar, (**A, B**) 1 mm, or (**C, D**), 100  $\mu$ m.
